# Supplementary material for: Upregulation of OASIS/CREB3L1 in podocytes contributes to the disturbance of kidney homeostasis
Source: PubMed Central journal article supplement (PMC9307819; doi:10.1038/s42003-022-03709-x), 2022-07-22
Supplement: 42003_2022_3709_MOESM2_ESM.pdf [file 42003_2022_3709_MOESM2_ESM.pdf]

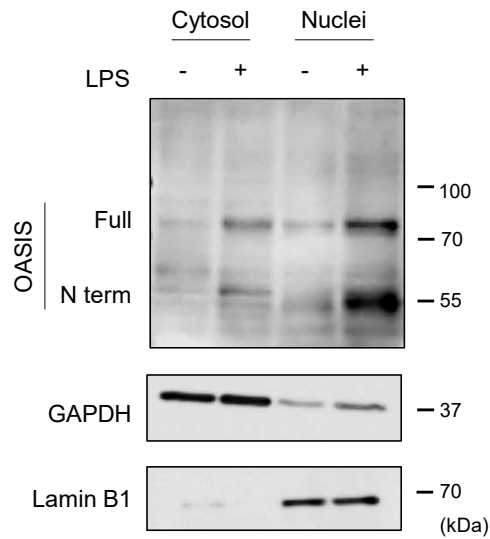

**Supplementary Figure 1.** *The N-terminal domain of OASIS was increased in the nuclear fraction of LPS-treated podocytes.*

Podocytes were stimulated with LPS (10 ng/mL) for 6 h. The cytosolic and nuclear fraction were prepared, and immunoblotting was performed using anti-OASIS, anti-Lamin B1 and anti-GAPDH antibodies. Representative images are shown.

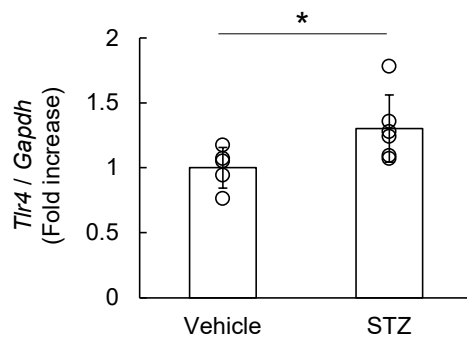

**Supplementary Figure 2.** *Tlr4 mRNA expression level was higher in STZ-induced DN model.*

C57BL/6 mice were intraperitoneally administered with STZ. The transcript expression level of *Tlr4* was examined at 8-12 weeks after STZ treatment, using quantitative PCR. The expression level was normalized to that of *Gapdh*. Data are shown as mean  $\pm$  SD (n=5 for vehicle and n=6 for STZ), \* $P$  < 0.05, as analyzed using Student's *t*-test.

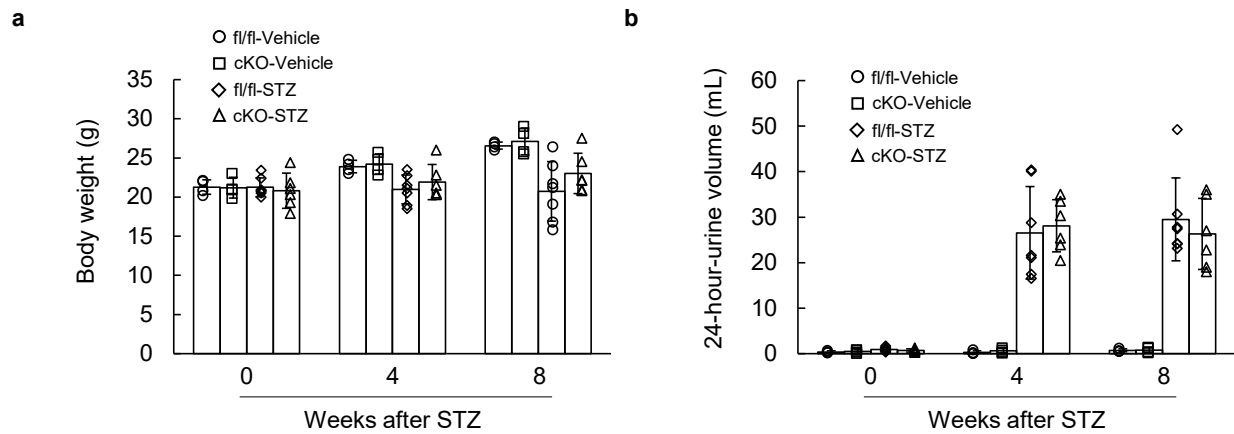

**Supplementary Figure 3.** *There were no differences in body weight and urine volume between OASIS cKO and fl/fl mice in STZ-induced DN model.*

**a-b** OASIS cKO and fl/fl mice were subjected to uninephrectomy, followed by treatment with STZ or vehicle, as a control. Body weight and twenty-four-hour-urine volume were measured at 0, 4 and 8 weeks after STZ treatment. Data are shown as mean  $\pm$  SD (n=4 for fl/fl-vehicle and cKO-vehicle, n=7 for fl/fl-STZ, and n=6 for cKO-STZ).

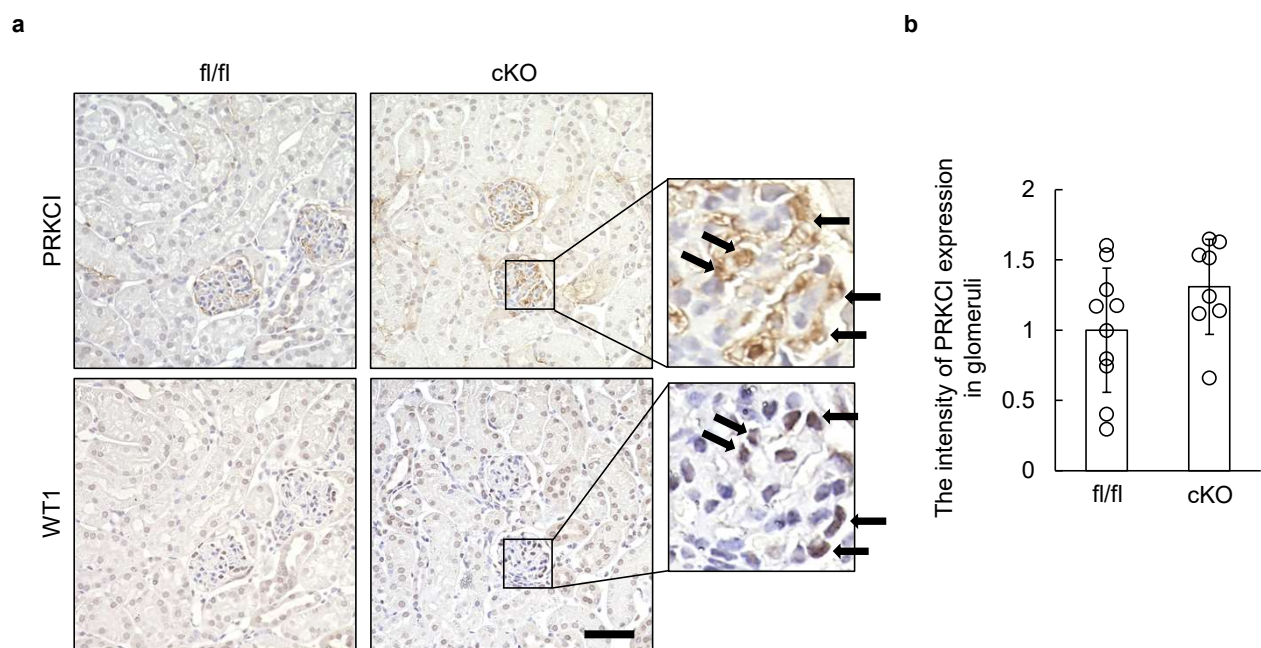

**Supplementary Figure 4.** *The PRKCI protein expression in glomeruli was not significantly altered in OASIS cKO mice.*

Immunohistochemistry was performed using an anti-PRKCI or anti-WT-1 antibody in serial sections of the LPS-treated fl/fl and cKO mice. Representative images and the intensity of PRKCI expression in glomeruli are shown. Arrows: PRKCI expressed in podocytes. Scale bar: 50  $\mu$ m. Data are shown as mean  $\pm$  SD (n=10 for fl/fl-LPS and n=8 for cKO-LPS).

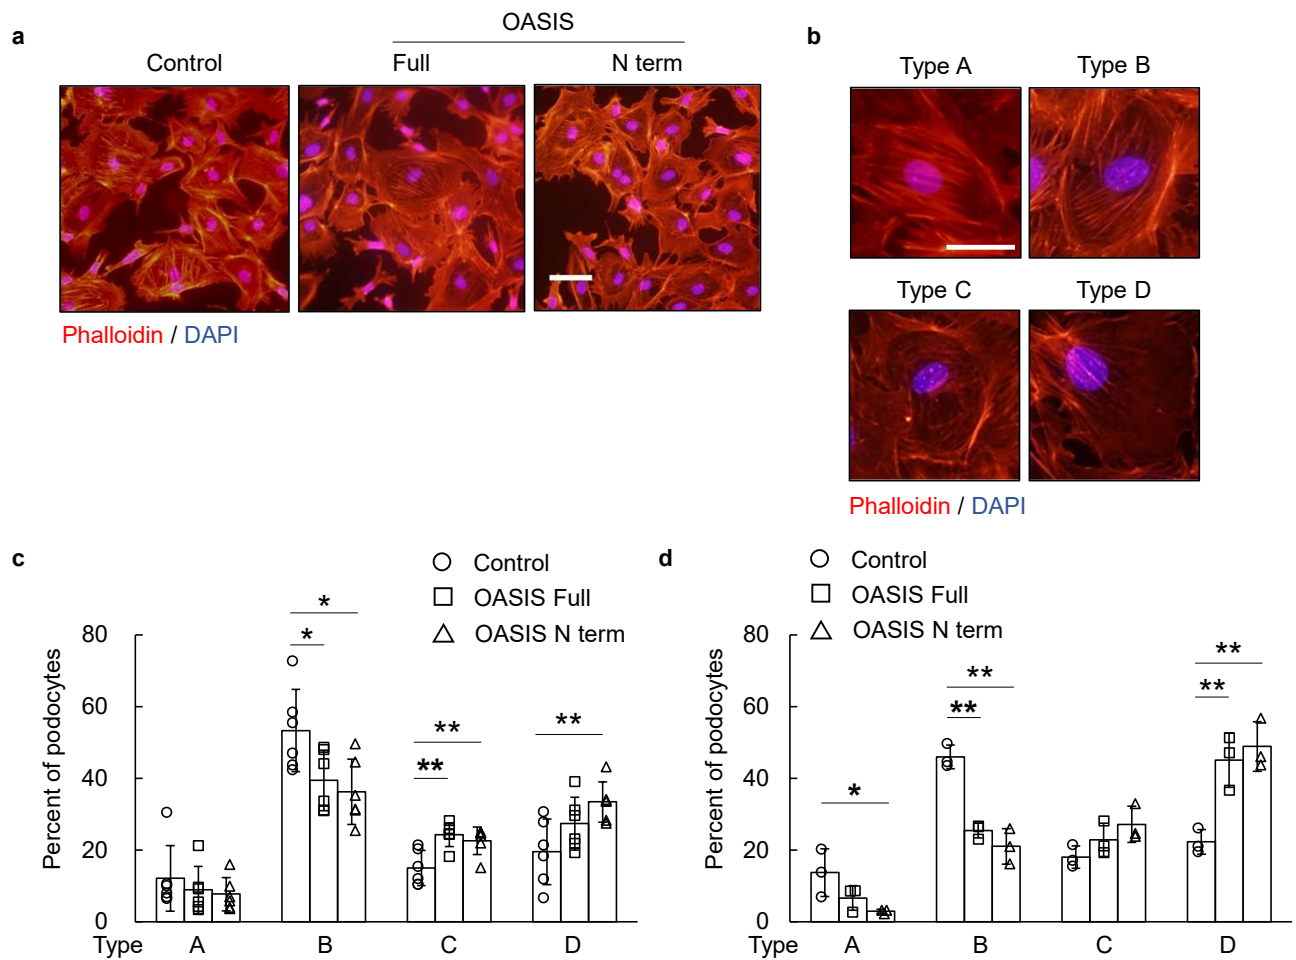

**Supplementary Figure 5. Actin stress fibers were reduced in OASIS-overexpressed podocytes.**

**a-c** Murine cultured podocytes were transfected with a lentivirus expressing the full length or active form of *Oasis*, or *venus* (as a control). Two or four days after transfection, immunofluorescence analysis was performed using Alexa Fluor 546-phalloidin and DAPI. **a** Representative images of podocytes treated with lentiviruses for 4 days are shown. Scale bar: 20  $\mu\text{m}$ . **b** Representative images of different types of phalloidin staining patterns are shown. Scale bar: 10  $\mu\text{m}$ . **c-d** Quantification of phalloidin staining patterns in podocytes was performed 2 (**c**) or 4 (**d**) days after transfection of lentiviruses. Data are shown as mean  $\pm$  SD (n=6 (**c**), n=3 (**d**) for each group), \* $P < 0.05$  and \*\* $P < 0.01$ , as analyzed using Dunnett test.

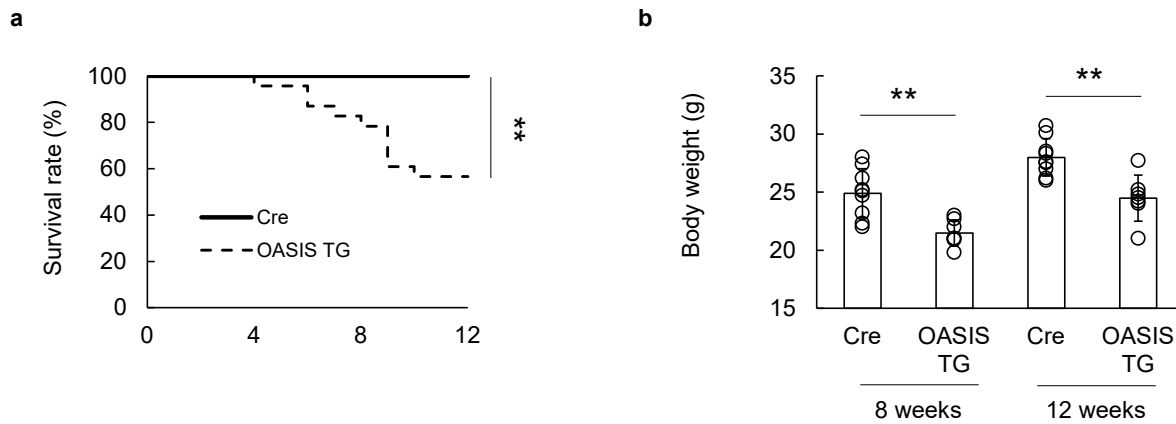

**Supplementary Figure 6. Survival rate and body weight were decreased in mice overexpressing the podocyte-restricted OASIS.**

**a** The survival rate after birth was estimated using the Kaplan-Meier method and log-rank test (n=21 for Cre and n=23 for OASIS TG).  $**P < 0.01$ . **b** Body weight was measured in Cre or OASIS TG mice. Data are shown as mean  $\pm$  SD (n=9 for Cre and n=7 for OASIS TG),  $**P < 0.01$ , as analyzed using Student's *t*-test at each time-point.

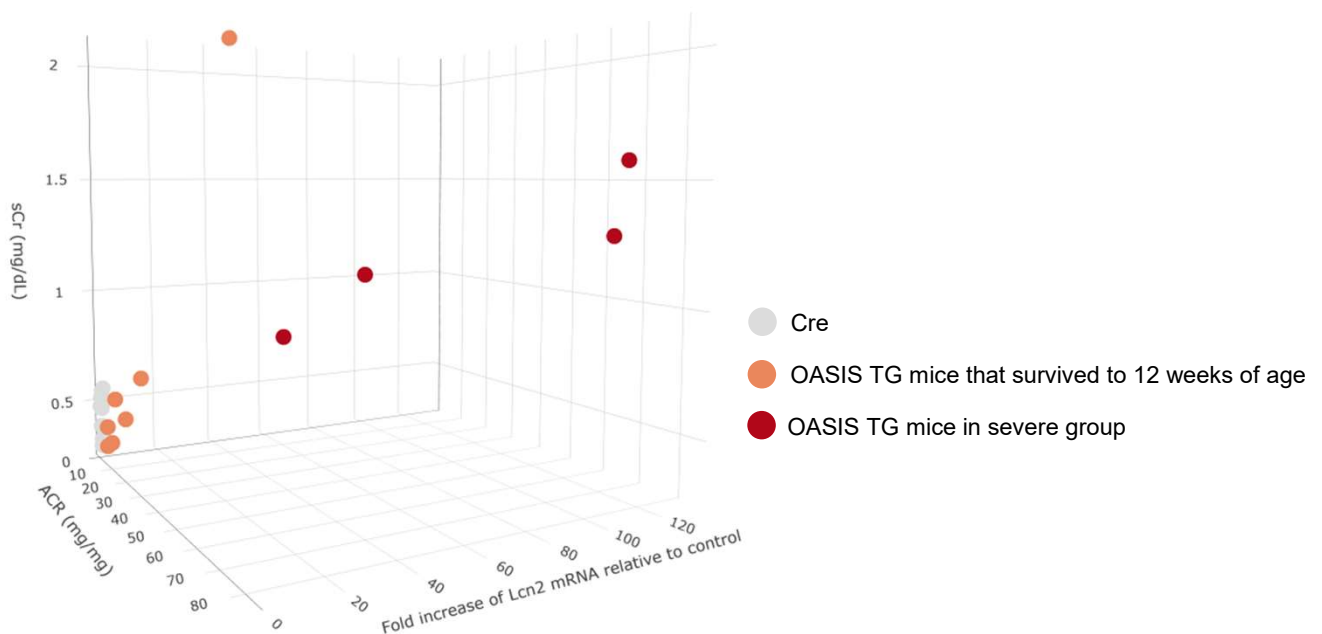

**Supplementary Figure 7. Kidney function was decreased in severe group of OASIS TG mice.**

sCr and the expression of *Lcn2* mRNA was examined in OASIS TG mice with ACR levels exceeding 15,000  $\mu$ g/mg by the age of 8 weeks. (n=9 for Cre, n=7 for OASIS TG mice that survived to 12 weeks of age, and n=4 for OASIS TG mice in severe group).

**a**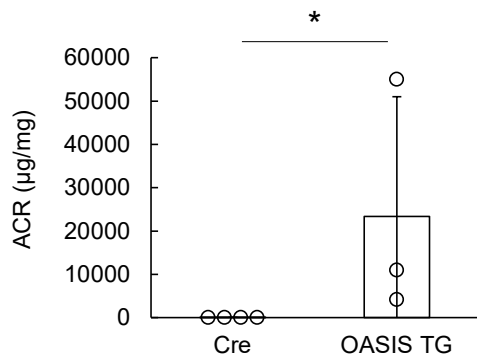**b**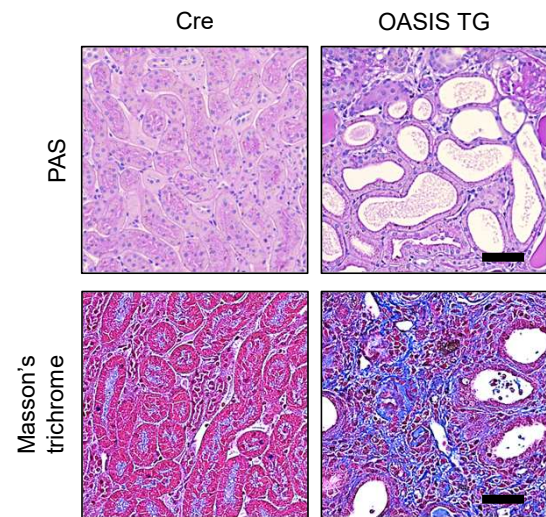

**Supplementary Figure 8. Kidney injury was also observed in another line of podocyte-restricted OASIS TG mice.**

ACR, and representative images of Periodic acid-Schiff staining and Masson's trichrome staining were shown. Scale bar: 50 µm. Data are shown as mean  $\pm$  SD (n=4 for Cre and n=3 for OASIS TG), \* $P$ <0 .05, as analyzed using Mann-Whitney U test.

Supplementary Figure 9. *Unedited blot/gel images.*

Figure 1D

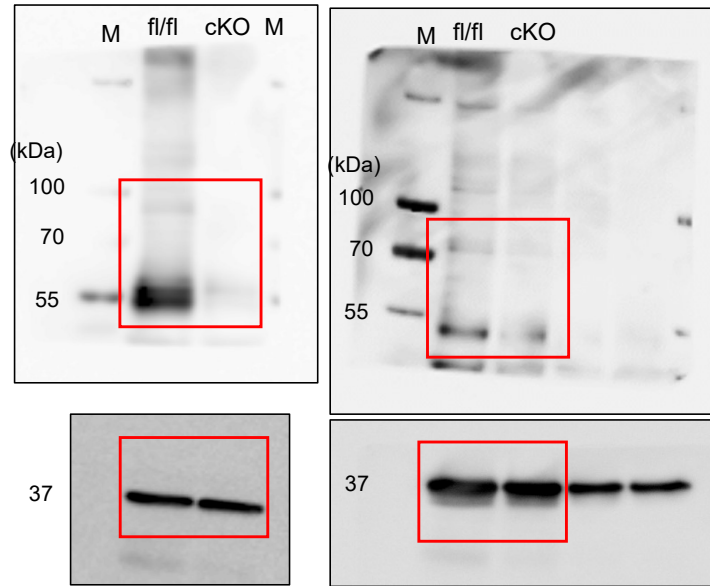

Figure 1E

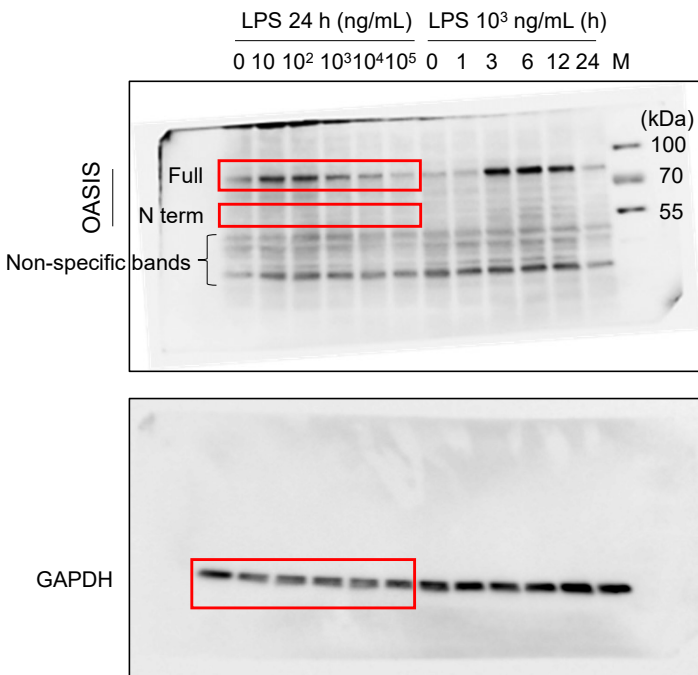

M: molecular marker

Figure 1F

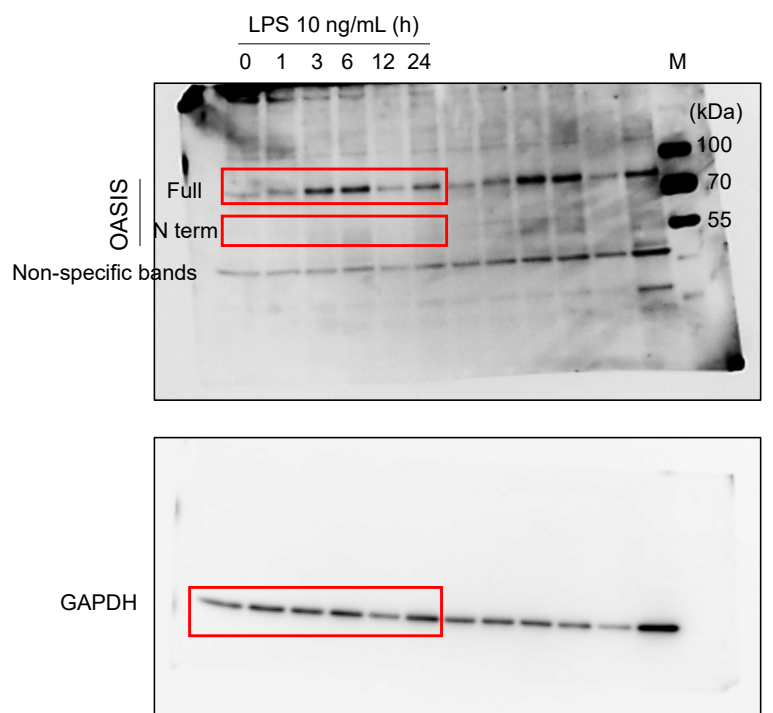

M: molecular marker

Supplementary Figure 9. *Unedited blot/gel images.*

Figure 1G

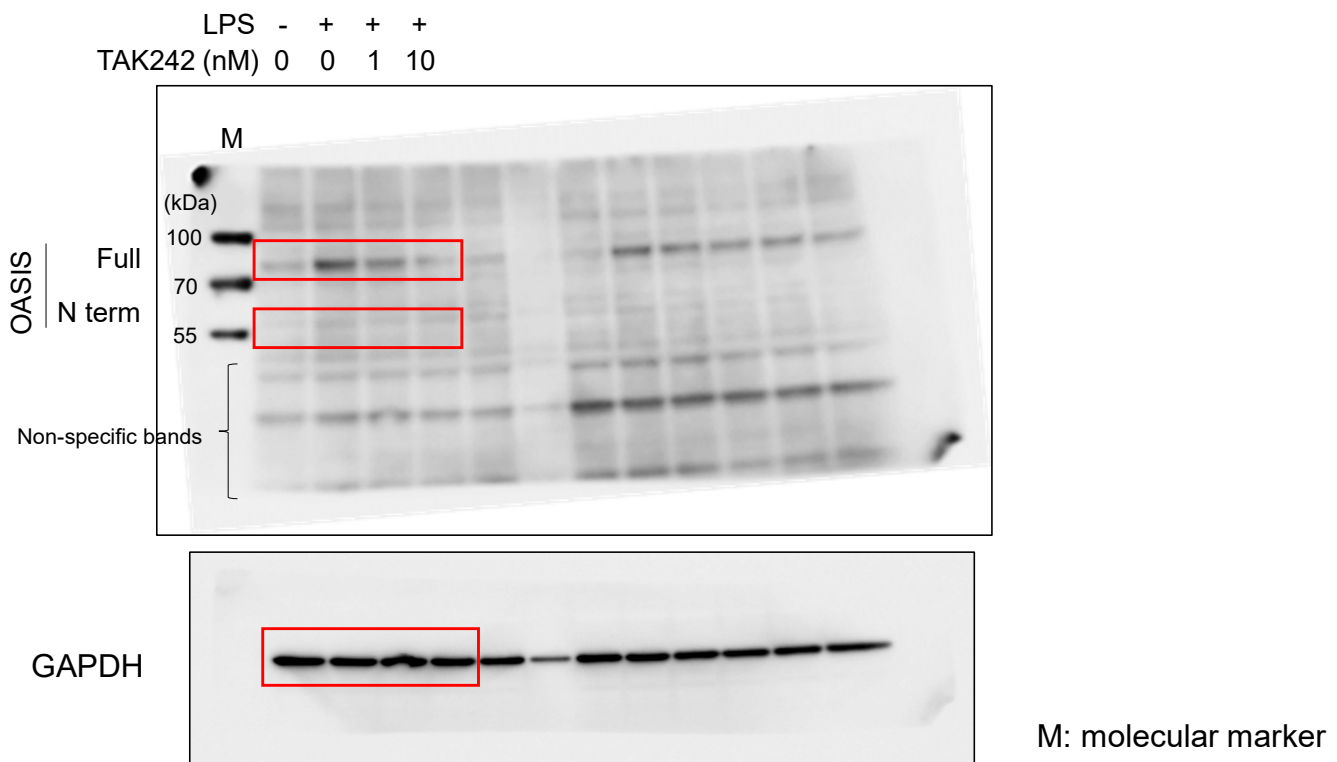

Figure 1H

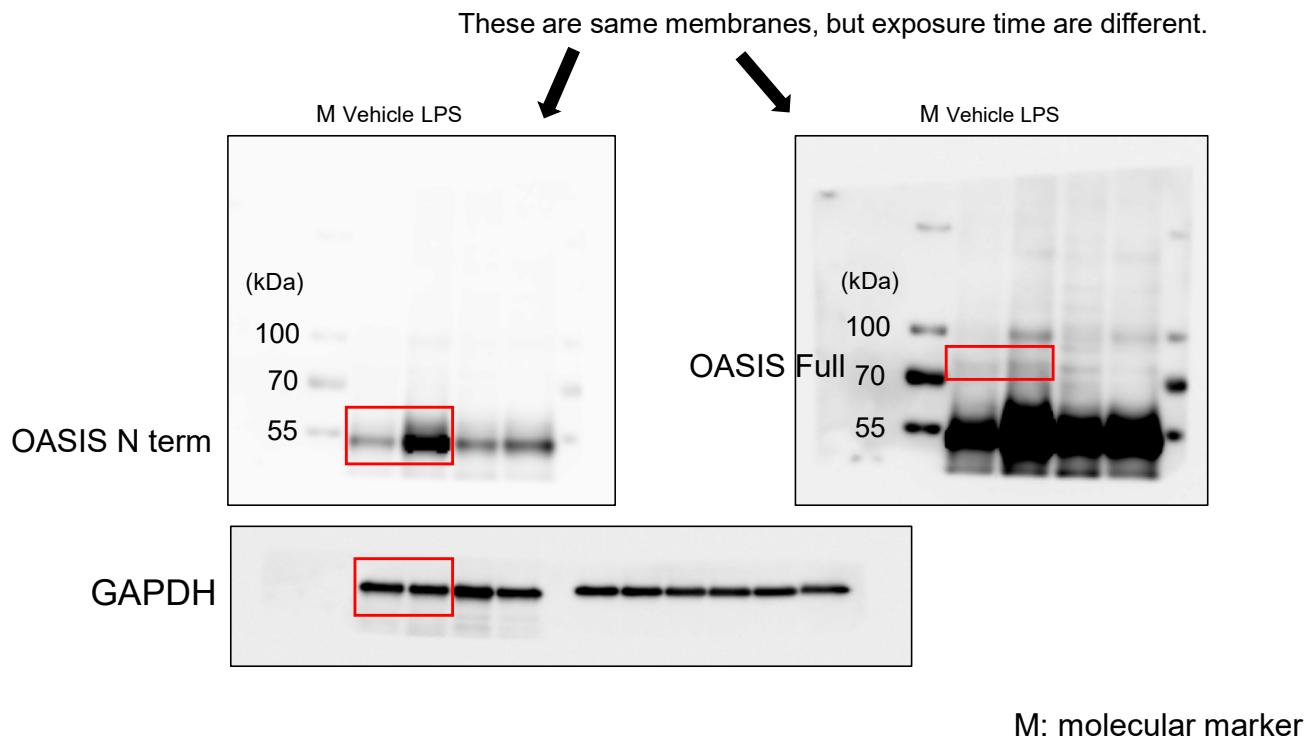

Supplementary Figure 9. *Unedited blot/gel images.*

Figure 4A

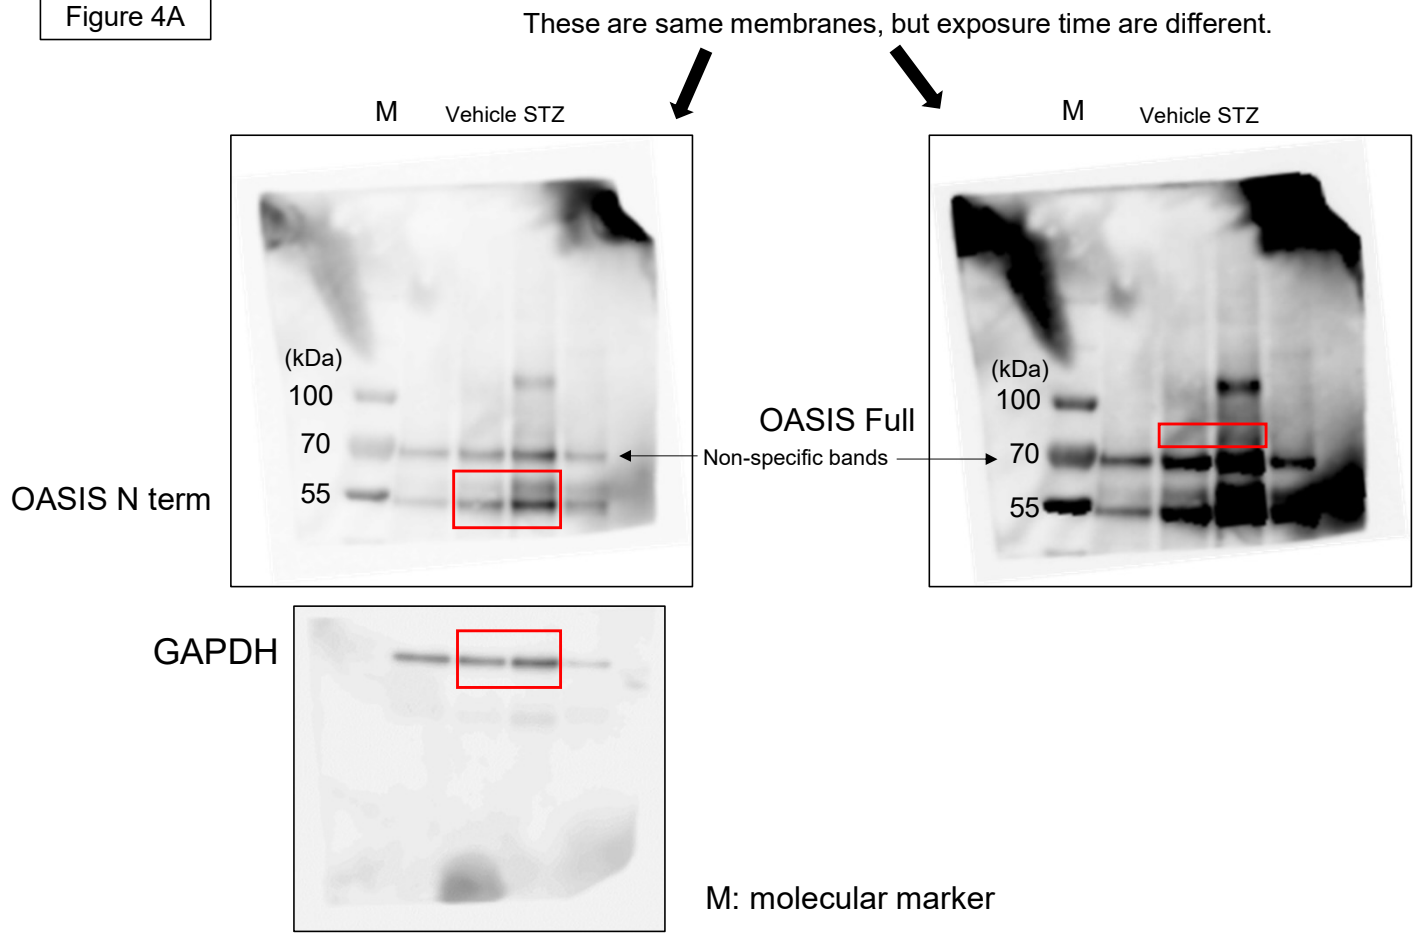

Figure 5A

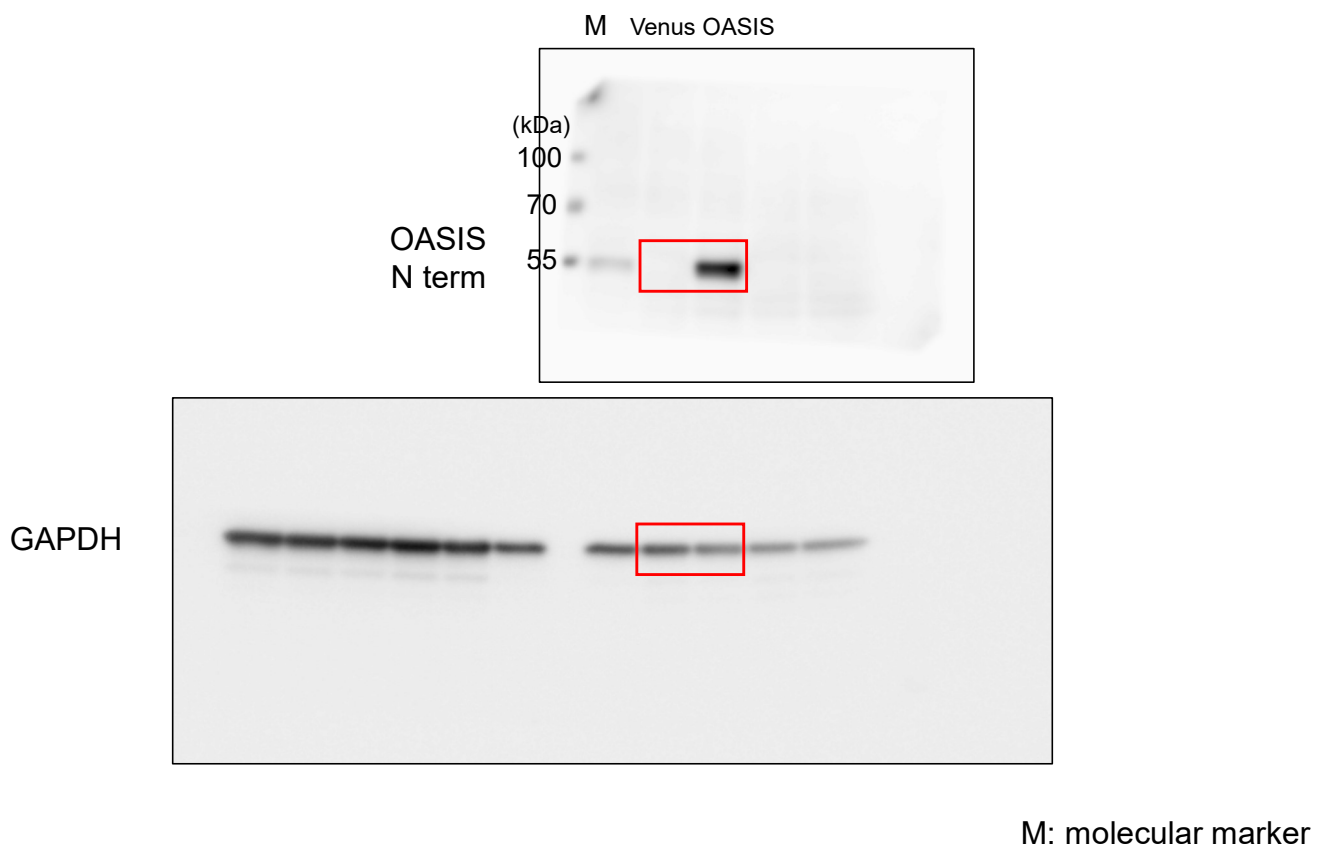



Supplementary Figure 9. *Unedited blot/gel images.*

Figure 5G

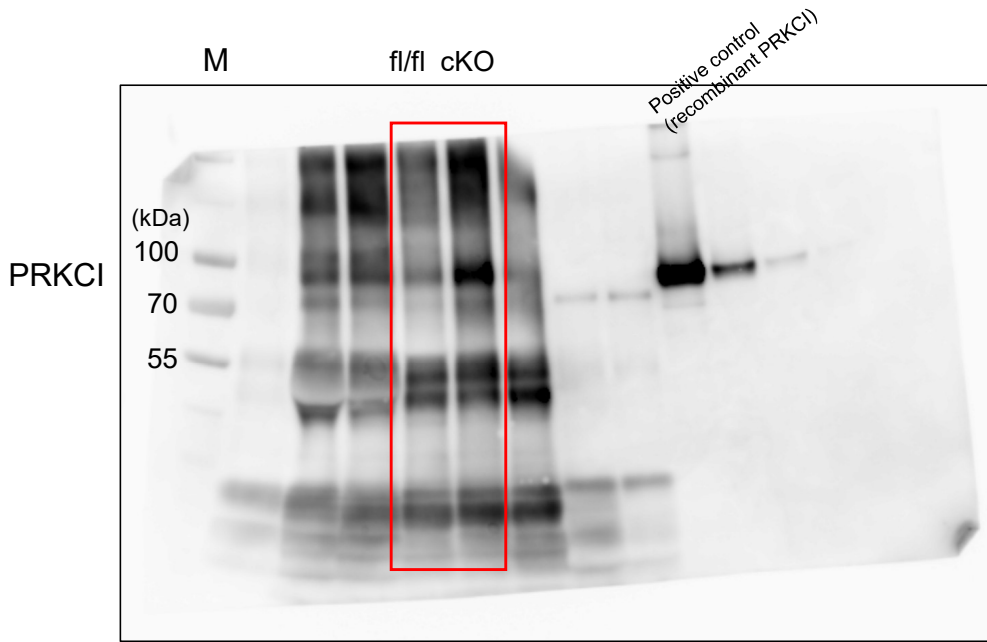

M: molecular marker

Figure 6B

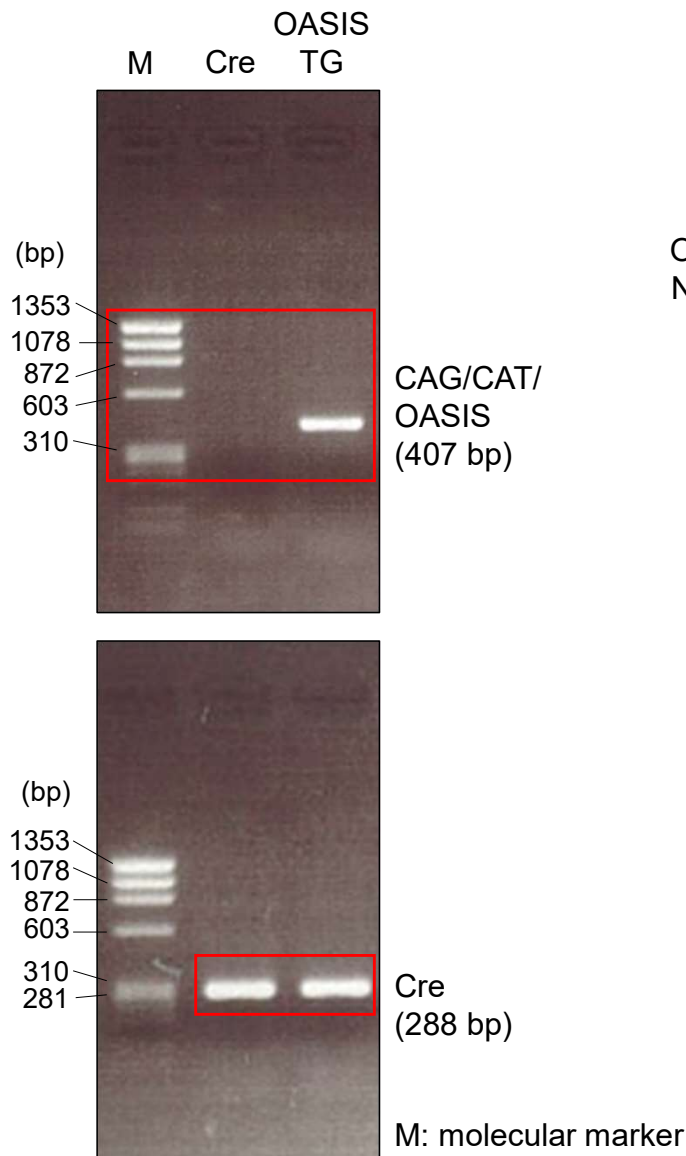

Figure 6C

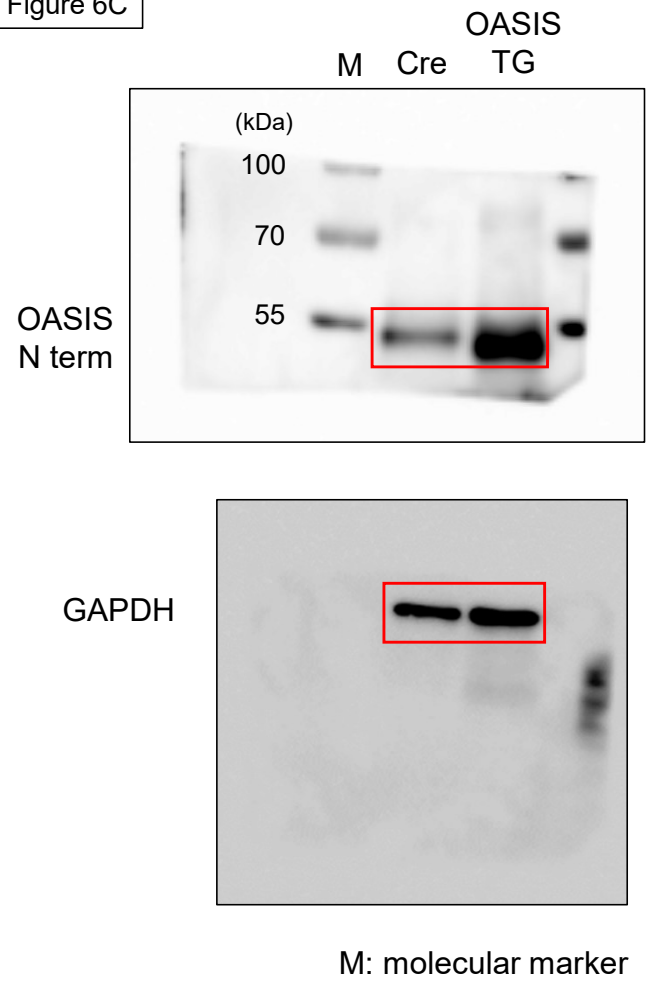

M: molecular marker

Supplementary Figure 9. *Unedited blot/gel images.*

Supplementary Figure 1

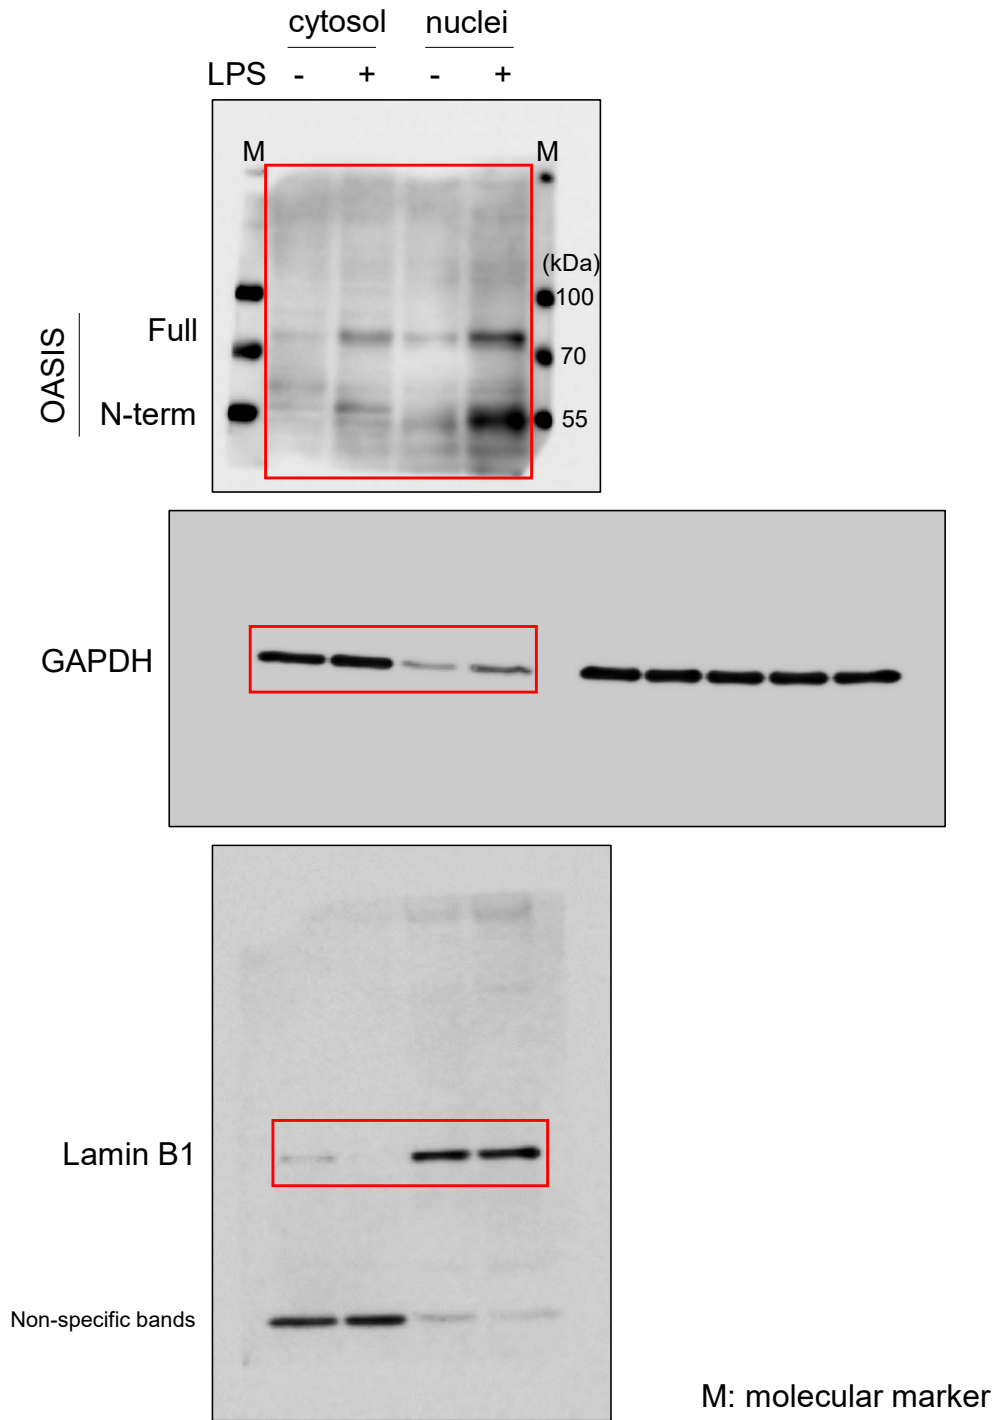

## Supplementary Tables

**Supplementary Table 1. The primers used in this study.**

| Gene               | Species | Direction                     | Sequence                     | Usage |
|--------------------|---------|-------------------------------|------------------------------|-------|
| <i>Gapdh</i>       | Mouse   | Forward                       | 5'-CATCACCATCTTCCAGGAGCG-3'  | qPCR  |
|                    |         | Reverse                       | 5'-GAGGGGCCATCCACAGTCTTC-3'  |       |
| <i>Nphs1</i>       |         | Forward                       | 5'-CCCAGAAGCTGTGGATTGAG-3'   |       |
|                    |         | Reverse                       | 5'-GAAAGTGCTGCCGGAATTCT-3'   |       |
| <i>Nphs2</i>       |         | Forward                       | 5'-CATCAAGCCCTCTGGATTAG-3'   |       |
|                    |         | Reverse                       | 5'-CAGATGTCCCAGTCGGAATA-3'   |       |
| <i>Lcn2</i>        |         | Forward                       | 5'-GGCTGTCGCTACTGGATCAG-3'   |       |
|                    |         | Reverse                       | 5'-GTCCGTGGTGGCCACTTGCA-3'   |       |
| <i>Colla1</i>      |         | Forward                       | 5'-GGCAAGAATGGAGATGATGG-3'   |       |
|                    |         | Reverse                       | 5'-ATCCAAACCACTGAAGCCTC-3'   |       |
| <i>Fibronectin</i> |         | Forward                       | 5'-ACACCATACCTGCCGAATGTAG-3' |       |
|                    |         | Reverse                       | 5'-GAGAGCTTCCTGTCTGTAGAG-3'  |       |
| <i>Prkci</i>       |         | Forward                       | 5'-GCAGTGAGGTTTCGAGATATG-3'  |       |
|                    |         | Reverse                       | 5'-GCCTGAAAGCCTCTTCTAAC-3'   |       |
| <i>Wnt5a</i>       |         | Forward                       | 5'-CAGTACCAGTTCCGGCATCG-3'   |       |
|                    |         | Reverse                       | 5'-GCTCGGCTCATGGCGTTCAC-3'   |       |
| <i>Edpr1</i>       |         | Forward                       | 5'-TGTCCTACGATGGTCTCAAC-3'   |       |
|                    |         | Reverse                       | 5'-AAGGGGATCTTTGCACACTG-3'   |       |
| <i>Gadd45 α</i>    |         | Forward                       | 5'-CTGCTACTGGAGAACGAC-3'     |       |
|                    |         | Reverse                       | 5'-GATCCATGTAGCGACTTTCC-3'   |       |
| <i>Rdh11</i>       | Forward | 5'-GATCCACTTCCATAACCTGC-3'    |                              |       |
|                    | Reverse | 5'-TAATAGAGGAGTACCGCGTC-3'    |                              |       |
| <i>Pten</i>        | Forward | 5'-TTGAGTTCCTCAGCCATTG-3'     |                              |       |
|                    | Reverse | 5'-TTCTGAGGTTTCCTCTGGTC-3'    |                              |       |
| <i>Cdc37l1</i>     | Forward | 5'-AGGAGAGTGACTIONTAGACGTG-3' |                              |       |
|                    | Reverse | 5'-CTAAGCTGCCAAGTTTCTGC-3'    |                              |       |
| <i>Adamts12</i>    | Forward | 5'-CACATGAACTGGTCACAGC-3'     |                              |       |
|                    | Reverse | 5'-AGAAGCGAGTGATGTACTCC-3'    |                              |       |
| <i>Maged2</i>      | Forward | 5'-CTGGGATTCATCACTCACTC-3'    |                              |       |
|                    | Reverse | 5'-AAGAACTCGTACTCAGGAGG-3'    |                              |       |

(continued)

| Gene                 | Species | Direction                  | Sequence                     | Usage  |
|----------------------|---------|----------------------------|------------------------------|--------|
| <i>Polr3k</i>        | Mouse   | Forward                    | 5'-GCTAAAAGAAGTGGACGACG-3'   | qPCR   |
|                      |         | Reverse                    | 5'-TAGAAGGTGGTCATTGGCTC-3'   |        |
| <i>Cgrefl</i>        |         | Forward                    | 5'-GCTTTCGCTCTTTGCTCTTC-3'   |        |
|                      |         | Reverse                    | 5'-AGCACCGAGTCTACTACTAG-3'   |        |
| <i>Col7a1</i>        |         | Forward                    | 5'-GTACCAAGTATGGCTGACTG-3'   |        |
|                      |         | Reverse                    | 5'-CAATAGAGGTATCCACCACG-3'   |        |
| <i>Ada</i>           |         | Forward                    | 5'-CCATCAAGCCAGAAACCATC-3'   |        |
|                      |         | Reverse                    | 5'-GTCCATGCCGATAATGTTGC-3'   |        |
| <i>Pcolce2</i>       |         | Forward                    | 5'-AGCAGAAGTGTAGACGGATG-3'   |        |
|                      |         | Reverse                    | 5'-ACACTCATGTTCTTGCCAGC-3'   |        |
| <i>Metrn1</i>        |         | Forward                    | 5'-CCAGTATGAGCTGATGAGTG-3'   |        |
|                      |         | Reverse                    | 5'-GGTAGATGACTGACACTTGC-3'   |        |
| <i>Colla2</i>        |         | Forward                    | 5'-TCTCTACTGGTGAAACCTGC-3'   |        |
|                      |         | Reverse                    | 5'-GCTGAGTTGCCATTCCTTG-3'    |        |
| <i>Mme11</i>         |         | Forward                    | 5'-CTCCAGATACAGCGTCTTTG-3'   |        |
|                      |         | Reverse                    | 5'-GGAGCGATATAGTGTCTTGG-3'   |        |
| <i>Adamts17</i>      |         | Forward                    | 5'-ACATGTACCAACTCCCAAGG-3'   |        |
|                      |         | Reverse                    | 5'-TCCAGTGAGCTTGTGCATAC-3'   |        |
| <i>Hpse</i>          |         | Forward                    | 5'-GAGAGCAGTACCAAAAGGAG-3'   |        |
|                      |         | Reverse                    | 5'-CAGTAGTCAAGGAGAAGCTG-3'   |        |
| <i>Dusp13</i>        | Forward | 5'-ATGGATCTTCCCAATCGTG-3'  |                              |        |
|                      | Reverse | 5'-AGAGTAGCAAAGTGGCAGAG-3' |                              |        |
| <i>Lox</i>           | Forward | 5'-AGGGTACTGCTACGATTTCC-3' |                              |        |
|                      | Reverse | 5'-GGTCATAGTGGCTGAATTCG-3' |                              |        |
| <i>Tlr4</i>          | Forward | 5'-GAAACTCAGCAAAGTCCCTG-3' |                              |        |
|                      | Reverse | 5'-GTTTGAGAGGTGGTGTAAGC-3' |                              |        |
| <i>Lcn2</i>          | Human   | Forward                    | 5'-TGTGACTACTGGATCAGGAC-3'   |        |
|                      | Human   | Reverse                    | 5'-GGGTGATCTTGAAGTACTCC-3'   |        |
| <i>Oasis/Creb3l1</i> | Mouse   | Forward                    | 5'-GCTGGACGAGAAGAGTGCTCTG-3' | RT-PCR |
|                      |         | Reverse                    | 5'-GTTCCACATCTTGAGTGGTGTC-3' |        |

(continued)

| Gene                   | Species | Direction | Sequence                        | Usage      |
|------------------------|---------|-----------|---------------------------------|------------|
| <i>Cre recombinase</i> | Mouse   | Forward   | 5'-CGATGCAACGAGTGATGAGG-3'      | Genotyping |
|                        |         | Reverse   | 5'-GCATTGCTGTCACTTGGTCGT-3'     |            |
| <i>Oasis flox</i>      |         | Forward   | 5'-AAGGTGAGGAAGTTTGTGAGATTG-3'  |            |
|                        |         | Reverse   | 5'-TAAGTGGGGTTGGAGGATCTAAATC-3' |            |
| <i>Oasis TG</i>        |         | Forward   | 5'-GCCATACCACATTTGTAGAG-3'      |            |
|                        |         | Reverse   | 5'-TGAGGAAATCCGACTCATTC-3'      |            |
