# Supplementary material for: Upregulation of OASIS/CREB3L1 in podocytes contributes to the disturbance of kidney homeostasis
Source: PubMed Central journal article supplement (PMC9307819; doi:10.1038/s42003-022-03709-x), 2022-07-22
Supplement: 42003_2022_3709_MOESM3_ESM.pdf [file 42003_2022_3709_MOESM3_ESM.pdf]

## Description of Additional Supplementary Files

**File name:** Supplementary Data 1

**Description:** Source data underlying plots shown in figures.
